# Supplementary material
Source: PubMed Central journal article supplement (PMC9752781)
Supplement: mmc1.pdf [file mmc1.pdf]

# THE LANCET

## Supplementary appendix

This appendix formed part of the original submission. We post it as supplied by the authors.

**This online publication has been corrected. The corrected version first appeared at [thelancet.com](https://www.thelancet.com) on June 24, 2021.**

Supplement to: Patel MG, Dorward J, Yu L-M, Hobbs FDR, Butler CC. Inclusion and diversity in the PRINCIPLE trial. *Lancet* 2021; **397**: 2251–52.

## Supplementary Appendix

**Table S1: Examples of organisations and communities engaging with the PRINCIPLE trial through pharmacy and community outreach work**

| Pharmacy businesses and organisations                                    | Cultural, religious and community organisations                                       | Other professional, government and health organisations and institutions | Local, regional and national media                       | Universities                     |
|--------------------------------------------------------------------------|---------------------------------------------------------------------------------------|--------------------------------------------------------------------------|----------------------------------------------------------|----------------------------------|
| All Cures Pharmacy Essex, South West and South East London (30 branches) | BAPS Swaminarayan Hindu Sanstha UK                                                    | APNA NHS                                                                 | Asian Voice                                              | City University Birmingham       |
| Asda Pharmacy England, Scotland and Wales (254 pharmacy branches)        | Bradford Council of Mosques                                                           | Bradford District & Craven Clinical Commissioning Group NHS              | BBC Radio Bradford                                       | De Montfort University Leicester |
| Avon Local Pharmaceutical Committee                                      | Bradford Hindu Council                                                                | British Indian Nurses Association (BINA)                                 | BBC Radio Leeds                                          | University of Bradford           |
| Boots UK (2245 pharmacy branches)                                        | Indian Muslim Welfare Society (representing 8 mosques) Kirklees & Calderdale District | British Islamic Medical Association (BIMA)                               | BBC Radio North West                                     |                                  |
| Buckinghamshire Local Pharmaceutical Committee                           | Oshwal Association UK Jain Community                                                  | British Physicians of Indian Origin (BAPIO) North East                   | BBC Radio South Yorkshire                                |                                  |
| Camden & Islington Local Pharmaceutical Committee                        | Sikh Alliance of Yorkshire (SAY)                                                      | British Physicians of Indian Origin (BAPIO) South West                   | BBC Radio South Yorkshire Aap Ki Mehfil (Hindi)          |                                  |
| City & Hackney Local Pharmaceutical Committee                            | World Tamil Organisation UK                                                           | British Physicians of Indian Origin (BAPIO) UK                           | BBC Radio Sheffield                                      |                                  |
| Community Pharmacy Scotland (1258 pharmacy branches)                     |                                                                                       | CITY Health Bradford GP Federation (27 GP surgeries)                     | Chemist+Druggist (C+D) Magazine                          |                                  |
| Community Pharmacy West Yorkshire (540 pharmacy branches)                |                                                                                       | Diabetes Specialist Nurse Forum (DSN) UK                                 | Eastern Eye (British Asian newspaper)                    |                                  |
| Cornwall Local Pharmaceutical Committee                                  |                                                                                       | Lancashire Public Health, Lancashire County Council                      | Garavi Gujarat (Gujarati Newspaper)                      |                                  |
| Day Lewis PLC (263 pharmacy branches)                                    |                                                                                       | NHS England & NHS Improvement Primary Care                               | Gujarat Samachar (Gujarati Newspaper)                    |                                  |
| Devon Local Pharmaceutical Committee                                     |                                                                                       | NIHR Clinical Research Network Yorkshire and Humber                      | Independent Community Pharmacist                         |                                  |
| Greater Manchester Local Pharmaceutical Committee                        |                                                                                       | NIHR Clinical Research Network East Midlands                             | ITV Calendar North                                       |                                  |
| Guild of Healthcare Pharmacists (UNITE Trade Union)                      |                                                                                       | NIHR Clinical Research Network Eastern                                   | KANSHI TV Midlands (Punjabi)                             |                                  |
| H I Weldricks Pharmacy Group Yorkshire (61 pharmacy branches)            |                                                                                       | NIHR Clinical Research Network Greater Manchester                        | Link FM 967 Sheffield Pakistani Radio (Urdu and English) |                                  |
| Hertfordshire Local Pharmaceutical Committee                             |                                                                                       | NIHR Clinical Research Network North East and North                      | Pharmaceutical Journal                                   |                                  |
| Hertfordshire Local Pharmaceutical Committee                             |                                                                                       | NIHR Clinical Research Network West Midlands                             | Pharmacy Business                                        |                                  |
| Hospital Expert Advisory Group Royal Pharmaceutical Society              |                                                                                       | North West North Tyneside Primary Care Network                           | Pharmacy Magazine                                        |                                  |
| i2i Smart Practice Pharmacist Network, Soar Beyond Ltd                   |                                                                                       | Punjabi Doctors and Dentists Association                                 | P3 Magazine                                              |                                  |
| Imaan Healthcare North West and Yorkshire (44 pharmacy branches)         |                                                                                       | ReCoVa-19 Ltd (COVID-19 Testing)                                         | Telegraph & Argus                                        |                                  |
| Kamsons Pharmacy (75 pharmacy branches)                                  |                                                                                       | Sikh Alliance of Yorkshire (SAY)                                         | Times Radio                                              |                                  |

|                                                                           |  |                                          |                                                |  |
|---------------------------------------------------------------------------|--|------------------------------------------|------------------------------------------------|--|
| Kensington, Chelsea and Westminster Local Pharmaceutical Committee        |  | South Asian Health Foundation (SAHF)     | Yorkshire Post                                 |  |
| Kent Local Pharmaceutical Committee                                       |  | South Durham Health CIC GP Federation    | Other local, national, and international press |  |
| Lloyds Pharmacy UK (1532 branches)                                        |  | The Queens Nursing Institute             |                                                |  |
| National Association of Primary Care (NAPC)                               |  | UK Black Pharmacists Association (UKBPA) |                                                |  |
| National Pharmaceutical Association (NPA) approx. 6000 pharmacy contracts |  |                                          |                                                |  |
| North of Tyne Local Pharmaceutical Committee                              |  |                                          |                                                |  |
| North Staffordshire Local Pharmaceutical Committee                        |  |                                          |                                                |  |
| Pharmaceutical Services Negotiating Committee (PSNC)                      |  |                                          |                                                |  |
| Pharmacy Vaccinations Lead London Area                                    |  |                                          |                                                |  |
| Practice Plus Group UK                                                    |  |                                          |                                                |  |
| Primary Care Pharmacists Association (PCPA)                               |  |                                          |                                                |  |
| Retired Pharmacist Group Royal Pharmaceutical Society                     |  |                                          |                                                |  |
| Rowlands Pharmacy (527 pharmacy branches)                                 |  |                                          |                                                |  |
| Royal Pharmaceutical Society                                              |  |                                          |                                                |  |
| Saffron Pharmacy Group (12 pharmacy branches)                             |  |                                          |                                                |  |
| Sheppards Pharmacy South Wales (34 pharmacy branches)                     |  |                                          |                                                |  |
| Somerset Local Pharmaceutical Committee                                   |  |                                          |                                                |  |
| Somerset Local Pharmaceutical Committee                                   |  |                                          |                                                |  |
| South of Tyne Local Pharmaceutical Committee                              |  |                                          |                                                |  |
| South Staffordshire Local Pharmaceutical Committee                        |  |                                          |                                                |  |
| Superdrug Pharmacy and Nurse Clinic sites (201 outlets)                   |  |                                          |                                                |  |
| Weldricks Pharmacy South Yorkshire (80 branches)                          |  |                                          |                                                |  |
| Well Pharmacy (754 pharmacy branches)                                     |  |                                          |                                                |  |
| Whitworth Chemists Ltd North England (34 pharmacy branches)               |  |                                          |                                                |  |
| Other independent community pharmacies                                    |  |                                          |                                                |  |
